# Supplementary material for: Genetic Diversity of Leuconostoc mesenteroides Isolates from Traditional Montenegrin Brine Cheese
Source: MDPI journal article supplement (doi:10.3390/microorganisms9081612), 2021-07-28

**Figure S2.** 16S rDNA based species identification of all 16 Montenegrin brine cheese *Leuconostoc* sp. isolates.

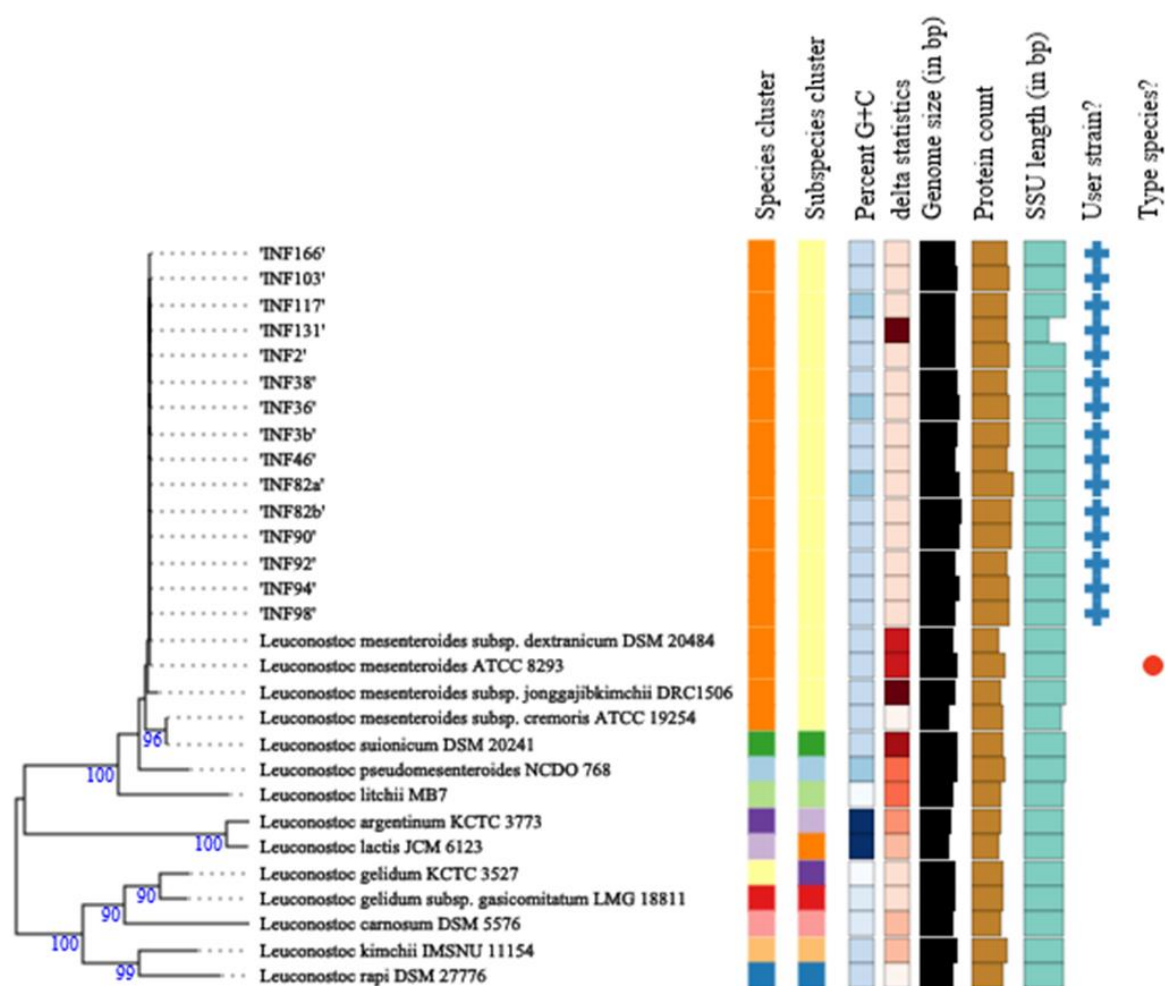

Supplement: s1 [file s1]
