# Supplementary material for: Genetic Diversity of Leuconostoc mesenteroides Isolates from Traditional Montenegrin Brine Cheese
Source: MDPI journal article supplement (doi:10.3390/microorganisms9081612), 2021-07-28

**Figure S1.** Regions of Montenegro with respect to climate, environmental conditions and regional food specialities. Locations of cheese producers marked in green. Adapted from Martinović et al. 2021 [52].

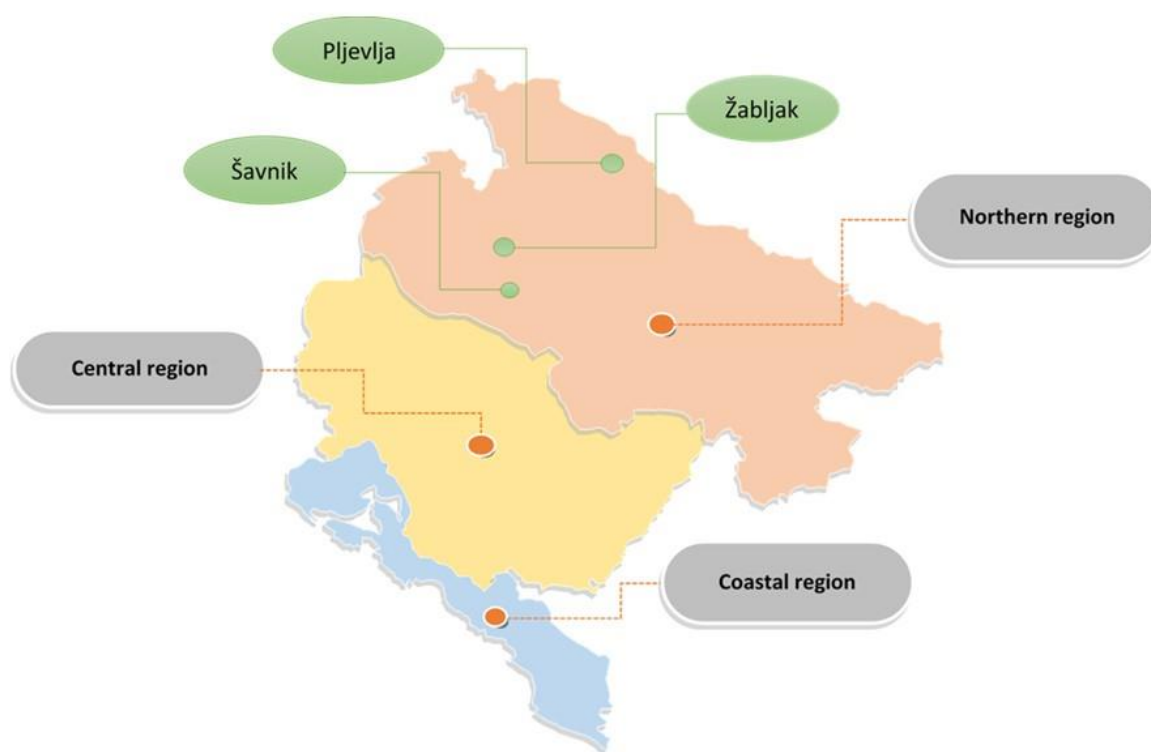

Supplement: s1 [file s1]
