# Supplementary material for: Genetic Diversity of Leuconostoc mesenteroides Isolates from Traditional Montenegrin Brine Cheese
Source: MDPI journal article supplement (doi:10.3390/microorganisms9081612), 2021-07-28

**Figure S4.** MLST: Minimum spanning tree (MST) comprising the 16 Montenegrin brine cheese *Ln. mesenteroides* isolates and 72 isolates downloaded from GenBank. Isolates are colored according to their country of origin.

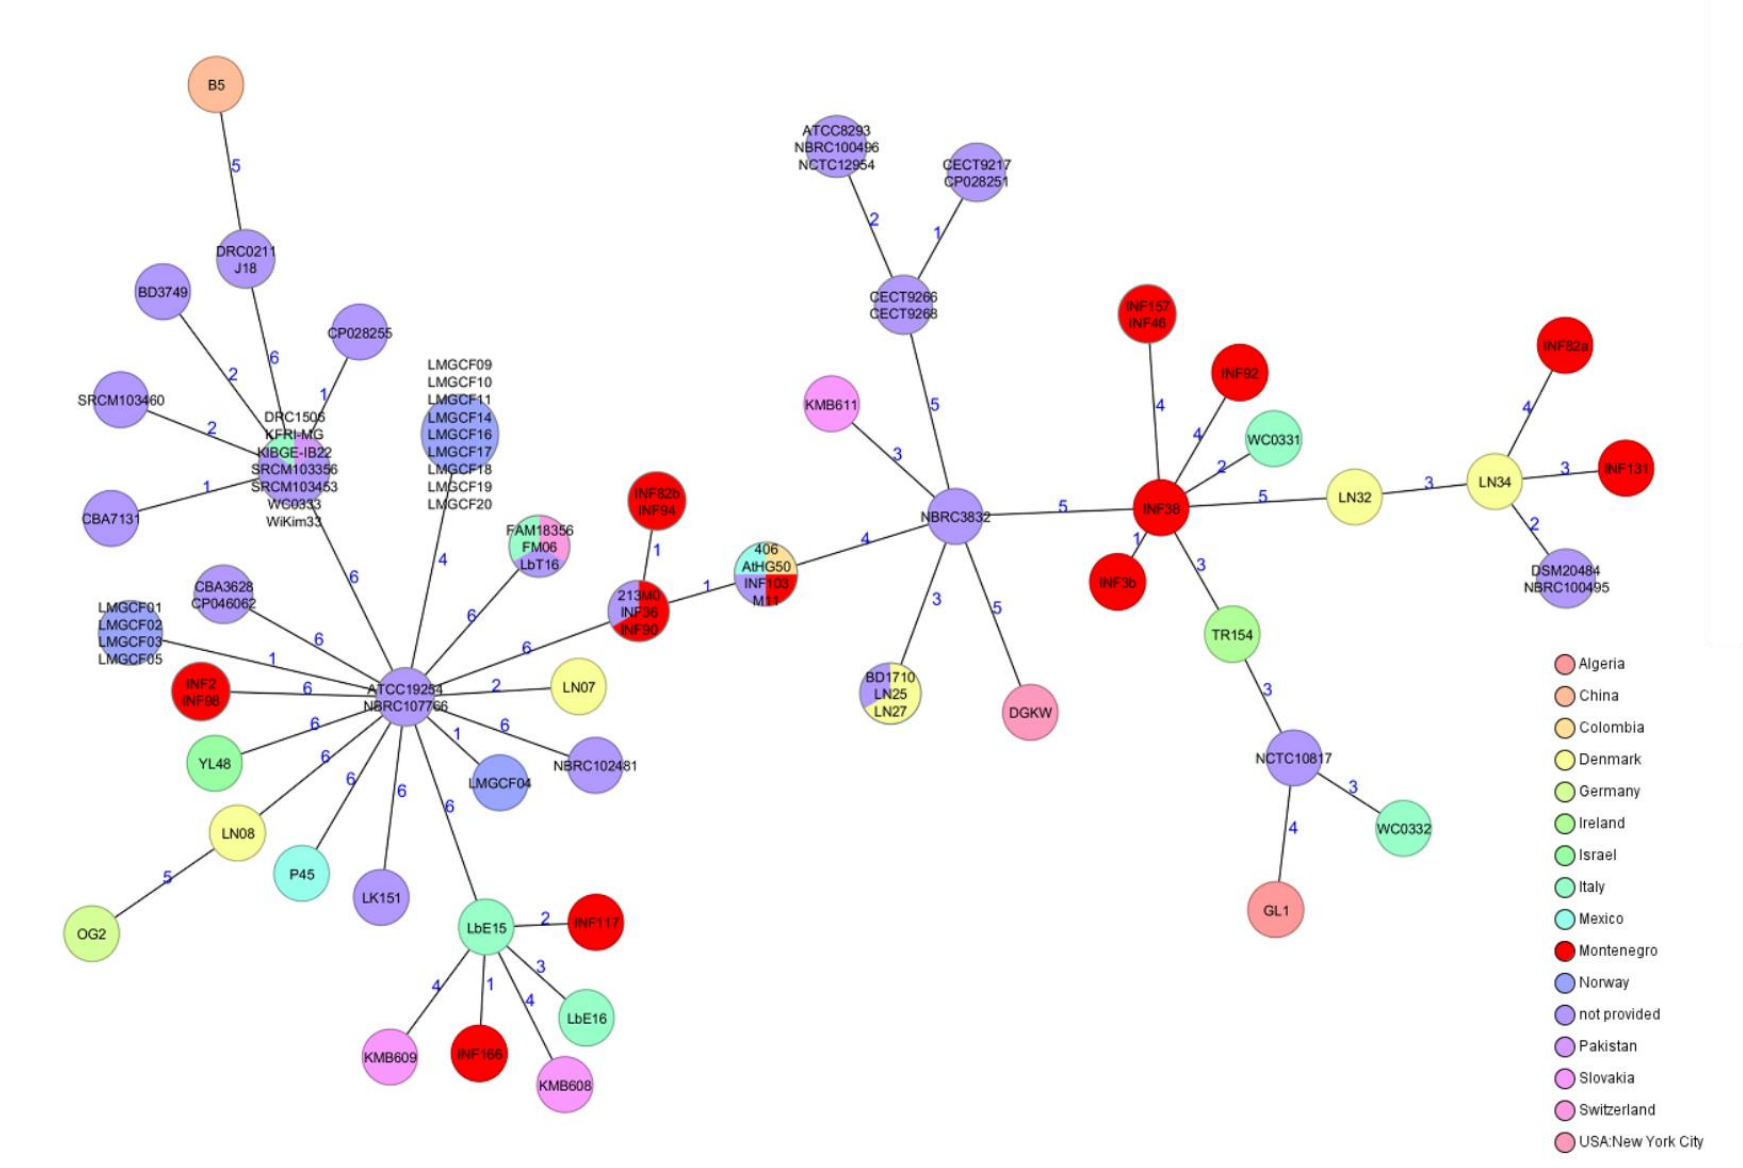

Supplement: s1 [file s1]
