# Supplementary material for: Genetic Diversity of Leuconostoc mesenteroides Isolates from Traditional Montenegrin Brine Cheese
Source: MDPI journal article supplement (doi:10.3390/microorganisms9081612), 2021-07-28
Supplement: s1 [file s1]

**Table S4.** Genome data. Lowest allelic distance of Montenegrin brine cheese isolates to reference strains are indicated in green color. StrainID colors indicate strains differentiated by less than 45 alleles in their core genome. (P) Producers.

| P | Cheese ID | Strain ID | Subsp.-Id                      | Allelic distance ATCC8293 | Allelic distance ATCC19254 | Allelic distance DSM20484 | Allelic distance DRC1506 | Coverage | Contigs | Genome size (Mb) | Genes | Coding genes | Pseudo Genes | RNA Genes | Accession No.   |
|---|-----------|-----------|--------------------------------|---------------------------|----------------------------|---------------------------|--------------------------|----------|---------|------------------|-------|--------------|--------------|-----------|-----------------|
|   |           |           | TYGS                           |                           |                            |                           |                          |          |         |                  |       |              |              |           |                 |
| A | 2-1406    | INF2      | <i>Ln. m. cremoris?</i>        | 844                       | 790                        | 811                       | 810                      | 41       | 192     | 2.03             | 2,202 | 1,992        | 150          | 60        | JAGFYL000000000 |
|   | 3-1406    | INF3b     | <i>Ln. m. mesenteroides</i>    | 793                       | 814                        | 742                       | 816                      | 45       | 233     | 2.13             | 2,231 | 2,121        | 110          | 61        | JAFREC000000000 |
| B | 1-1404    | INF36     | <i>Ln. m. mesenteroides</i>    | 635                       | 811                        | 863                       | 805                      | 51       | 246     | 2.16             | 2,232 | 2,141        | 91           | 65        | JAFREB000000000 |
|   | 2-1404    | INF38     | <i>Ln. m. mesenteroides</i>    | 781                       | 814                        | 767                       | 805                      | 37       | 163     | 2.06             | 2,173 | 2,011        | 99           | 63        | JAFREA000000000 |
| C | 1453      | INF46     | <i>Ln. m. mesenteroides</i>    | 793                       | 820                        | 792                       | 816                      | 31       | 205     | 2.04             | 2,153 | 1,979        | 109          | 65        | JAFRDZ000000000 |
| D | 1-3763    | INF82a    | <i>Ln. m. dextranicum</i>      | 849                       | 792                        | 293                       | 818                      | 26       | 351     | 2.14             | 2,295 | 2,094        | 139          | 62        | JAFRDY000000000 |
|   |           | INF82b    | <i>Ln. m. mesenteroides</i>    | 637                       | 815                        | 865                       | 809                      | 40       | 184     | 2.25             | 2,365 | 2,205        | 100          | 60        | JAGFYK000000000 |
|   | 3-3763    | INF90     | <i>Ln. m. mesenteroides</i>    | 634                       | 815                        | 863                       | 809                      | 41       | 258     | 2.23             | 2,368 | 2,221        | 85           | 62        | JAFRDY000000000 |
|   |           | INF92     | <i>Ln. m. mesenteroides</i>    | 791                       | 813                        | 755                       | 815                      | 21       | 233     | 1.99             | 2,074 | 1,905        | 109          | 60        | JAFRDW000000000 |
|   |           | INF94     | <i>Ln. m. mesenteroides</i>    | 621                       | 803                        | 849                       | 793                      | 29       | 388     | 2.18             | 2,292 | 2,144        | 89           | 59        | JAFRDV000000000 |
|   | 4-3763    | INF98     | <i>Ln. m. cremoris?</i>        | 841                       | 787                        | 809                       | 808                      | 32       | 313     | 2.02             | 2,169 | 1,958        | 151          | 60        | JAFRDU000000000 |
| E | 4-3758    | INF103    | <i>Ln. m. mesenteroides</i>    | 576                       | 765                        | 800                       | 754                      | 10       | 515     | 2.10             | 2,259 | 2,107        | 95           | 57        | JAFRDT000000000 |
| F | 4-14246   | INF117    | <i>Ln. m. joggajibkimchii?</i> | 786                       | 811                        | 861                       | 810                      | 25       | 288     | 2.02             | 2,183 | 2,022        | 102          | 59        | JAGFYJ000000000 |
| G | Ž         | INF 131   | <i>Ln. m. dextranicum</i>      | 699                       | 797                        | 358                       | 824                      | 25       | 216     | 2.03             | 2,139 | 1,958        | 121          | 60        | JAGFYI000000000 |
| H | 3-1387*   | INF157    | <i>Ln. m. mesenteroides</i>    | 793                       | 818                        | 791                       | 816                      | 93       | 91      | 1.99             | 2,010 | 1,888        | 84           | 38        | JAGSYL000000000 |
| I | 4-1383*   | INF166    | <i>Ln. m. joggajibkimchii?</i> | 774                       | 811                        | 850                       | 807                      | 39       | 113     | 2.03             | 2,185 | 2,018        | 107          | 60        | JAFRDS000000000 |
