# Supplementary material for: Genetic Diversity of Leuconostoc mesenteroides Isolates from Traditional Montenegrin Brine Cheese
Source: MDPI journal article supplement (doi:10.3390/microorganisms9081612), 2021-07-28
Supplement: s1 [file s1]

Seed Genome:

\* NC\_008531.1 (25-AUG-2019), 2038396 bases, 1955 genes with CDS (*Leuconostoc mesenteroides* subsp. *mesenteroides* ATCC 8293, complete genome)

Penetration Query Genomes (18):

\* NC\_016805.3 (11-FEB-2020), 1900740 bases, 1795 genes with CDS (*Leuconostoc mesenteroides* subsp. *mesenteroides* J18, complete sequence)

\* NZ\_CP000574.1 (29-NOV-2019), 1896413 bases, 1820 genes with CDS (*Leuconostoc mesenteroides* KFRI-MG, complete genome)

\* NZ\_CP012009.1 (01-DEC-2019), 1818633 bases, 1784 genes with CDS (*Leuconostoc mesenteroides* subsp. *dextranicum* strain DSM 20484, complete genome)

\* NZ\_CP014610.1 (05-DEC-2019), 1986568 bases, 1925 genes with CDS (*Leuconostoc mesenteroides* subsp. *mesenteroides* strain BD3749, complete genome)

\* NZ\_CP014611.1 (19-FEB-2020), 1893478 bases, 1805 genes with CDS (*Leuconostoc mesenteroides* subsp. *jonggajibkimchii* strain DRC1506 chromosome, complete genome)

\* NZ\_CP013016.1 (17-OCT-2019), 1923948 bases, 1828 genes with CDS (*Leuconostoc mesenteroides* subsp. *mesenteroides* strain DRC0211, complete genome)

\* NZ\_CP015442.1 (17-DEC-2019), 2124039 bases, 2057 genes with CDS (*Leuconostoc mesenteroides* subsp. *mesenteroides* strain BD1710 chromosome, complete genome)

\* NZ\_CP020731.1 (20-DEC-2019), 1891719 bases, 1871 genes with CDS (*Leuconostoc mesenteroides* subsp. *mesenteroides* FM06, complete genome)

\* NZ\_AP017936.1 (21-DEC-2019), 2090103 bases, 2025 genes with CDS (*Leuconostoc mesenteroides* DNA, complete genome, strain: LK-151)

\* NZ\_CP021491.1 (08-MAR-2020), 1894793 bases, 1833 genes with CDS (*Leuconostoc mesenteroides* strain WiKim33 chromosome, complete genome)

\* NZ\_CP021966.1 (19-FEB-2020), 2004569 bases, 1945 genes with CDS (*Leuconostoc mesenteroides* strain CBA7131 chromosome, complete genome)

\* NZ\_CP035139.1 (06-MAR-2020), 1946833 bases, 1911 genes with CDS (*Leuconostoc mesenteroides* strain SRCM103356 chromosome, complete genome)

\* NZ\_CP035271.1 (06-MAR-2020), 2057400 bases, 2027 genes with CDS (*Leuconostoc mesenteroides* strain SRCM103453 chromosome, complete genome)

\* NZ\_CP035746.1 (09-MAR-2020), 1980926 bases, 1934 genes with CDS (*Leuconostoc mesenteroides* strain SRCM103460 chromosome, complete genome)

\* NZ\_CP042404.1 (16-AUG-2019), 1777320 bases, 1692 genes with CDS (*Leuconostoc mesenteroides* strain CBA3628 chromosome, complete genome)

\* NZ\_CP046062.1 (22-NOV-2019), 1777316 bases, 1687 genes with CDS (*Leuconostoc mesenteroides* subsp. *mesenteroides* strain CBA3607 chromosome, complete genome)

\* NZ\_CP028251.1 (23-JAN-2020), 1988249 bases, 1900 genes with CDS (*Leuconostoc mesenteroides* strain SRCM102733 chromosome, complete genome)

\* NZ\_CP028255.1 (23-JAN-2020), 1973483 bases, 1905 genes with CDS (*Leuconostoc mesenteroides* strain SRCM102735 chromosome, complete genome)

#### Seed Genome Filters:

- \* Minimum Length Filter (requires  $\geq 50$  bases)
- \* Start Codon Filter (requires start codon at beginning of the gene)
- \* Stop Codon Filter (requires single stop codon at end of gene)
- \* Homologous Gene Filter (requires no multiple copies of gene with BLAST overlap  $\geq 100$ bp, identity  $\geq 90.0\%$ )
- \* Gene Overlap Filter (requires no overlap with other genes  $> 4$  bases)

#### Query Genome BLAST Search:

- \* Requires BLAST hit with overlap=100%, identity  $\geq 90.0\%$  in every query genome
- \* BLAST options: Word size=11, Mismatch penalty=-1, Match reward=1, Gap open costs=5, Gap extension costs=2

#### Penetration Query Genomes Filters:

- \* Stop Codon Percentage Filter (requires single stop codon at end of gene in  $> 80\%$  penetration query genomes)

BLAST version 2.2.12

Citation: Altschul SF, Gish W, Miller W, Myers EW, Lipman DJ. 1990. Basic local alignment search tool. *J Mol Biol* 215:403-410.
