# Supplementary material for: Genetic Diversity of Leuconostoc mesenteroides Isolates from Traditional Montenegrin Brine Cheese
Source: Microorganisms. 2021 Jul 28;9(8):1612. doi: 10.3390/microorganisms9081612 (PMC8401054; doi:10.3390/microorganisms9081612)
Supplement: Supplementary file 1 [file microorganisms-09-01612-s001.zip]

Archive with 8 entries (8 files):
- Supplementary Figure S1 Regions of Montenegro.pdf
- Supplementary Figure S2 16s rDNA.pdf
- Supplementary Figure S3 ANI heatmap.pdf
- Supplementary Figure S4 MLST.pdf
- Supplementary Table S1_cgMLST_scheme_data.pdf
- Supplementary Table S2 ANI.xlsx
- Supplementary Table S3 dDDH.xlsx
- Supplementary Table S4_genome_data.pdf
