# Supplementary material for: Genetic Diversity of Leuconostoc mesenteroides Isolates from Traditional Montenegrin Brine Cheese
Source: Microorganisms. 2021 Jul 28;9(8):1612. doi: 10.3390/microorganisms9081612 (PMC8401054; doi:10.3390/microorganisms9081612)
Supplement: Supplementary file 1 [file microorganisms-09-01612-s001.zip › Supplementary Table S2 ANI.xlsx]

## Sheet: Tabelle1
	ATCC 19254	ATCC 8293	DRC1506	DSM20484	INF103	INF117	INF131	INF157	INF166	INF2	INF36	INF38	INF3b	INF46	INF82a	INF82b	INF90	INF92	INF94	INF98
ATCC 19254	100	98.5473	98.5749	98.5126	98.075	98.2437	98.6246	98.689	98.2777	98.5016	98.1916	98.2153	98.0504	98.3096	98.3806	98.3314	98.0627	98.1106	98.0356	98.4452
ATCC 8293	98.446	100	98.8551	98.7297	98.8012	98.8133	98.7278	99.1279	98.9015	98.2478	98.9859	98.8808	98.9829	98.9331	98.6909	99.0819	98.9594	99.0127	98.7837	98.3156
DRC1506	98.4157	98.8545	100	98.5098	98.4653	98.6925	98.78	98.8122	98.8461	98.4527	98.6737	98.8031	98.8444	98.7896	98.6399	98.7003	98.5749	98.7652	98.4592	98.2806
DSM20484	98.5384	98.882	98.5142	100	98.3421	98.6214	99.4165	98.9771	98.7251	98.9278	98.6821	98.7983	98.8664	98.9866	99.3863	98.6766	98.7035	98.8003	98.4817	98.6874
INF103	98.2534	99.2711	98.8145	98.6116	99.9999	98.543	98.1704	98.9237	98.4418	98.1149	99.2959	98.3807	98.4769	98.4727	98.2087	99.6493	99.293	98.6068	99.2108	98.1965
INF117	98.0929	98.8067	98.8643	98.4921	98.2024	100	98.4828	98.996	99.299	98.3266	98.5723	98.6364	98.6155	98.8307	98.5323	98.6035	98.559	98.8163	98.5196	98.1081
INF131	98.4253	98.7681	98.7208	99.4353	98.2494	98.5576	100	99.0185	98.5306	98.4968	98.5043	98.7306	98.7887	98.7318	99.2036	98.4368	98.4532	98.9199	98.3625	98.2474
INF157	98.5472	99.1718	98.8748	98.8398	98.6477	99.0145	99.0462	100	99.0213	98.6562	99.0011	99.5173	99.5848	99.7464	98.8355	98.9912	98.9706	99.4232	98.6771	98.4826
INF166	98.2245	98.8374	98.8445	98.6144	98.4206	99.3374	98.452	98.9689	100	98.1428	98.3053	98.5855	98.6404	98.6654	98.6078	98.4698	98.3622	98.5519	98.4001	98.0116
INF2	98.2941	98.3064	98.5746	98.6534	97.9265	98.2153	98.4597	98.6005	98.1772	100	98.146	98.194	98.0874	98.164	98.5358	98.2903	97.9925	98.2985	98.0616	99.2416
INF36	97.9803	99.0236	98.6322	98.4205	98.8952	98.5177	98.397	99.0011	98.3252	97.9397	100	98.2985	98.2896	98.5472	98.3686	99.3942	99.1286	98.5549	99.0489	98.2177
INF38	97.9894	98.7951	98.8916	98.6434	98.2983	98.7651	98.582	99.4889	98.5602	98.129	98.2782	100	99.1816	99.0897	98.6025	98.5069	98.391	99.3174	98.2816	98.085
INF3b	97.9719	98.9182	98.8586	98.8044	98.1194	98.5273	98.8196	99.5397	98.6457	98.0678	98.4525	99.1071	100	99.1126	98.6952	98.4713	98.3803	99.5552	98.3943	97.8962
INF46	98.0087	98.9629	98.8219	98.6889	98.3321	98.5861	98.7201	99.7135	98.5695	98.2088	98.6029	99.0905	99.124	100	98.4441	98.5861	98.6175	99.2081	98.4322	97.9921
INF82a	98.4989	98.8028	98.718	99.2832	97.9992	98.5865	99.2931	98.9647	98.5258	98.462	98.4619	98.5154	98.842	98.6745	100	98.4056	98.3545	98.7545	98.3796	98.4249
INF82b	98.1444	98.9482	98.641	98.5026	99.1792	98.6732	98.4716	99.0153	98.4893	98.1216	99.3033	98.3436	98.4137	98.5428	98.4259	100	99.4921	98.6127	99.6365	98.2163
INF90	98.0318	98.9983	98.6208	98.4735	98.8233	98.5578	98.3393	98.9187	98.3415	98.0567	99.2806	98.2571	98.2383	98.5354	98.2522	99.5623	100	98.5465	99.2851	97.8751
INF92	98.0792	99.0261	98.8601	98.8828	98.2885	98.901	98.8989	99.6169	98.8081	98.45	98.704	99.2607	99.5553	99.2644	98.7693	98.6327	98.7065	100	98.5085	98.2285
INF94	98.1508	98.9711	98.6798	98.5358	99.161	98.7468	98.6516	98.8665	98.4712	98.2591	99.1909	98.5918	98.6038	98.5431	98.4219	99.9598	99.6162	98.858	100	98.3738
INF98	98.2117	98.4843	98.4546	98.7092	97.9127	98.2377	98.4448	98.7472	98.0299	99.3657	98.1858	98.1114	98.1384	98.0342	98.7662	98.2609	98.033	98.4668	98.0381	100
