# Supplementary material for: Genetic Diversity of Leuconostoc mesenteroides Isolates from Traditional Montenegrin Brine Cheese
Source: Microorganisms. 2021 Jul 28;9(8):1612. doi: 10.3390/microorganisms9081612 (PMC8401054; doi:10.3390/microorganisms9081612)
Supplement: Supplementary file 1 [file microorganisms-09-01612-s001.zip › Supplementary Table S3 dDDH.xlsx]

## Sheet: Sheet1
Type Strain Genome Server
Query strain	Subject strain	dDDH (d0, in %)	C.I. (d0, in %)	dDDH (d4, in %)	C.I. (d4, in %)	dDDH (d6, in %)	C.I. (d6, in %)	G+C content difference (in %)
'INF117'	'INF103'	78.8	[74.8 - 82.3]	90.5	[88.2 - 92.4]	83.7	[80.4 - 86.5]	0.57
'INF131'	'INF103'	76.8	[72.8 - 80.4]	89.4	[87.0 - 91.3]	81.8	[78.4 - 84.7]	0.08
'INF157'	'INF103'	77.9	[73.9 - 81.4]	93.7	[91.8 - 95.1]	83.4	[80.1 - 86.2]	0.07
'INF2'	'INF103'	73.4	[69.5 - 77.1]	87.4	[84.8 - 89.6]	78.5	[75.0 - 81.6]	0.01
'INF36'	'INF103'	81.3	[77.4 - 84.7]	95.4	[93.9 - 96.6]	86.6	[83.5 - 89.2]	0.49
'INF3b'	'INF103'	74.7	[70.7 - 78.3]	90.6	[88.3 - 92.4]	80.1	[76.7 - 83.1]	0.28
'INF46'	'INF103'	73.6	[69.6 - 77.2]	92.1	[90.0 - 93.7]	79.4	[76.0 - 82.4]	0.04
'INF82a'	'INF103'	70.1	[66.1 - 73.7]	89.8	[87.5 - 91.8]	75.8	[72.3 - 79.0]	0.72
'INF82b'	'INF103'	87.2	[83.7 - 90.1]	96.7	[95.4 - 97.6]	91.4	[88.9 - 93.5]	0.04
'INF90'	'INF103'	87.8	[84.3 - 90.6]	96.1	[94.8 - 97.2]	91.8	[89.2 - 93.7]	0.09
'INF92'	'INF103'	77.8	[73.8 - 81.4]	90.7	[88.5 - 92.5]	82.9	[79.6 - 85.7]	0.03
'INF94'	'INF103'	87.4	[83.9 - 90.3]	97.2	[96.0 - 98.0]	91.7	[89.1 - 93.6]	0
'INF98'	'INF103'	72.7	[68.7 - 76.3]	88.8	[86.3 - 90.8]	78	[74.6 - 81.1]	0.27
'INF131'	'INF117'	75.1	[71.2 - 78.7]	88.9	[86.5 - 90.9]	80.2	[76.8 - 83.2]	0.49
'INF157'	'INF117'	79.8	[75.9 - 83.2]	93.2	[91.3 - 94.7]	84.9	[81.7 - 87.7]	0.49
'INF2'	'INF117'	74.1	[70.1 - 77.7]	87.4	[84.9 - 89.6]	79.1	[75.6 - 82.1]	0.56
'INF36'	'INF117'	77.7	[73.7 - 81.2]	89.4	[87.0 - 91.4]	82.5	[79.2 - 85.4]	0.08
'INF3b'	'INF117'	77.6	[73.6 - 81.1]	90	[87.7 - 91.9]	82.5	[79.2 - 85.4]	0.29
'INF46'	'INF117'	76.5	[72.5 - 80.0]	91.4	[89.2 - 93.1]	81.8	[78.4 - 84.7]	0.53
'INF82a'	'INF117'	72.1	[68.1 - 75.7]	89.2	[86.8 - 91.2]	77.5	[74.1 - 80.7]	0.16
'INF82b'	'INF117'	75.1	[71.1 - 78.7]	90	[87.6 - 91.9]	80.3	[76.9 - 83.4]	0.53
'INF90'	'INF117'	75.7	[71.7 - 79.3]	89.5	[87.2 - 91.5]	80.8	[77.4 - 83.8]	0.66
'INF92'	'INF117'	78.7	[74.8 - 82.2]	91.2	[89.1 - 93.0]	83.7	[80.4 - 86.5]	0.6
'INF94'	'INF117'	75.3	[71.3 - 78.9]	90.4	[88.2 - 92.3]	80.6	[77.2 - 83.6]	0.57
'INF98'	'INF117'	71.7	[67.8 - 75.4]	87.5	[85.0 - 89.7]	77	[73.5 - 80.1]	0.3
'INF157'	'INF131'	79.5	[75.6 - 83.0]	94.2	[92.5 - 95.6]	84.9	[81.7 - 87.6]	0.01
'INF2'	'INF131'	75.6	[71.6 - 79.2]	89.6	[87.2 - 91.5]	80.8	[77.4 - 83.7]	0.07
'INF36'	'INF131'	75.1	[71.1 - 78.7]	89.1	[86.7 - 91.1]	80.2	[76.8 - 83.2]	0.4
'INF3b'	'INF131'	80.7	[76.7 - 84.1]	91.7	[89.5 - 93.4]	85.4	[82.3 - 88.1]	0.19
'INF46'	'INF131'	78.6	[74.6 - 82.1]	91.9	[89.8 - 93.6]	83.7	[80.4 - 86.5]	0.04
'INF82a'	'INF131'	80.5	[76.6 - 83.9]	94.4	[92.7 - 95.7]	85.7	[82.6 - 88.4]	0.64
'INF82b'	'INF131'	72.6	[68.7 - 76.3]	90.2	[87.9 - 92.1]	78.2	[74.8 - 81.3]	0.05
'INF90'	'INF131'	72.6	[68.6 - 76.2]	89.9	[87.6 - 91.8]	78.1	[74.7 - 81.2]	0.18
'INF92'	'INF131'	83.5	[79.6 - 86.7]	92	[89.9 - 93.7]	87.8	[84.8 - 90.2]	0.12
'INF94'	'INF131'	72.7	[68.7 - 76.3]	90.4	[88.1 - 92.2]	78.3	[74.8 - 81.4]	0.08
'INF98'	'INF131'	71.8	[67.9 - 75.5]	90.7	[88.5 - 92.6]	77.6	[74.1 - 80.7]	0.19
'INF103'	'INF166'	78.1	[74.1 - 81.6]	90.3	[88.0 - 92.2]	83	[79.7 - 85.9]	0.04
'INF117'	'INF166'	87.6	[84.1 - 90.4]	94.9	[93.3 - 96.1]	91.4	[88.9 - 93.5]	0.52
'INF131'	'INF166'	75.9	[71.9 - 79.5]	88.7	[86.3 - 90.8]	80.9	[77.5 - 83.8]	0.04
'INF157'	'INF166'	79.6	[75.6 - 83.0]	93.2	[91.3 - 94.7]	84.8	[81.6 - 87.5]	0.03
'INF2'	'INF166'	75.4	[71.4 - 79.0]	86.5	[83.9 - 88.8]	80.1	[76.7 - 83.1]	0.03
'INF36'	'INF166'	78.9	[75.0 - 82.4]	88.7	[86.3 - 90.8]	83.5	[80.2 - 86.3]	0.44
'INF38'	'INF166'	79	[75.0 - 82.5]	89.4	[87.0 - 91.3]	83.7	[80.4 - 86.5]	0.1
'INF3b'	'INF166'	77	[73.0 - 80.5]	90.5	[88.2 - 92.3]	82.1	[78.8 - 85.0]	0.23
'INF46'	'INF166'	75.9	[71.9 - 79.5]	91.4	[89.2 - 93.2]	81.3	[78.0 - 84.3]	0
'INF82a'	'INF166'	73	[69.0 - 76.6]	89.1	[86.7 - 91.1]	78.3	[74.9 - 81.4]	0.68
'INF82b'	'INF166'	74.2	[70.2 - 77.8]	89.8	[87.5 - 91.8]	79.6	[76.1 - 82.6]	0.01
'INF90'	'INF166'	73.9	[69.9 - 77.5]	88.6	[86.2 - 90.7]	79.1	[75.6 - 82.1]	0.14
'INF92'	'INF166'	77.6	[73.6 - 81.1]	91.5	[89.4 - 93.3]	82.8	[79.5 - 85.7]	0.08
'INF94'	'INF166'	74.6	[70.6 - 78.2]	90.4	[88.1 - 92.2]	80	[76.6 - 83.0]	0.04
'INF98'	'INF166'	72.5	[68.5 - 76.1]	87.4	[84.8 - 89.6]	77.6	[74.1 - 80.7]	0.23
'INF157'	'INF2'	72.6	[68.6 - 76.2]	91	[88.8 - 92.8]	78.3	[74.8 - 81.4]	0.07
'INF36'	'INF2'	73.9	[69.9 - 77.5]	86.6	[84.0 - 88.9]	78.7	[75.3 - 81.8]	0.48
'INF3b'	'INF2'	67.4	[63.5 - 71.0]	89	[86.6 - 91.1]	73.2	[69.7 - 76.4]	0.27
'INF46'	'INF2'	70	[66.1 - 73.7]	88.5	[86.0 - 90.5]	75.6	[72.1 - 78.7]	0.03
'INF82a'	'INF2'	69.3	[65.4 - 73.0]	89.4	[87.0 - 91.4]	75.1	[71.6 - 78.2]	0.71
'INF82b'	'INF2'	70.6	[66.7 - 74.2]	86.7	[84.1 - 89.0]	75.8	[72.3 - 79.0]	0.03
'INF90'	'INF2'	71.9	[68.0 - 75.6]	87.1	[84.6 - 89.3]	77.1	[73.6 - 80.2]	0.1
'INF92'	'INF2'	72.1	[68.2 - 75.8]	89.4	[87.0 - 91.3]	77.6	[74.2 - 80.7]	0.04
'INF94'	'INF2'	70.8	[66.8 - 74.4]	87.4	[84.9 - 89.6]	76.1	[72.6 - 79.2]	0.01
'INF98'	'INF2'	89.1	[85.8 - 91.8]	97.2	[96.1 - 98.0]	92.9	[90.6 - 94.7]	0.26
'INF157'	'INF36'	74.4	[70.4 - 78.0]	93.5	[91.7 - 95.0]	80.3	[76.9 - 83.3]	0.41
'INF3b'	'INF36'	71.5	[67.5 - 75.1]	89.8	[87.4 - 91.7]	77.1	[73.6 - 80.2]	0.21
'INF46'	'INF36'	73.4	[69.4 - 77.0]	91.3	[89.1 - 93.1]	79.1	[75.6 - 82.1]	0.45
'INF82a'	'INF36'	71.3	[67.4 - 75.0]	88.5	[86.1 - 90.6]	76.7	[73.3 - 79.9]	0.24
'INF82b'	'INF36'	81.8	[78.0 - 85.2]	95.5	[94.0 - 96.6]	87	[83.9 - 89.5]	0.45
'INF90'	'INF36'	82	[78.1 - 85.3]	95.1	[93.6 - 96.3]	87	[84.0 - 89.6]	0.58
'INF92'	'INF36'	73.5	[69.5 - 77.2]	90.9	[88.7 - 92.7]	79.1	[75.7 - 82.2]	0.52
'INF94'	'INF36'	81.7	[77.8 - 85.0]	95.7	[94.3 - 96.8]	86.9	[83.9 - 89.5]	0.49
'INF98'	'INF36'	72.6	[68.6 - 76.2]	87.8	[85.2 - 89.9]	77.8	[74.3 - 80.9]	0.22
'INF103'	'INF38'	77	[73.1 - 80.6]	90.3	[88.0 - 92.2]	82.1	[78.8 - 85.0]	0.05
'INF117'	'INF38'	78.4	[74.4 - 81.9]	90.6	[88.4 - 92.5]	83.3	[80.0 - 86.2]	0.62
'INF131'	'INF38'	79.5	[75.5 - 82.9]	89.8	[87.5 - 91.8]	84.1	[80.9 - 86.9]	0.14
'INF157'	'INF38'	82.1	[78.2 - 85.4]	97.7	[96.8 - 98.4]	87.6	[84.6 - 90.1]	0.13
'INF2'	'INF38'	70.9	[67.0 - 74.5]	88	[85.5 - 90.2]	76.3	[72.8 - 79.4]	0.06
'INF36'	'INF38'	72.5	[68.6 - 76.2]	88.8	[86.4 - 90.9]	77.9	[74.4 - 81.0]	0.54
'INF3b'	'INF38'	88.6	[85.2 - 91.3]	94.8	[93.2 - 96.1]	92.2	[89.7 - 94.1]	0.33
'INF46'	'INF38'	81.7	[77.8 - 85.1]	95.9	[94.5 - 97.0]	87	[83.9 - 89.5]	0.09
'INF82a'	'INF38'	74.2	[70.2 - 77.8]	90.1	[87.8 - 92.0]	79.6	[76.2 - 82.7]	0.78
'INF82b'	'INF38'	71.8	[67.8 - 75.5]	89.4	[87.0 - 91.3]	77.3	[73.9 - 80.4]	0.09
'INF90'	'INF38'	72.2	[68.2 - 75.8]	89	[86.6 - 91.0]	77.6	[74.2 - 80.7]	0.04
'INF92'	'INF38'	86.3	[82.6 - 89.3]	95.1	[93.5 - 96.3]	90.5	[87.8 - 92.6]	0.02
'INF94'	'INF38'	72	[68.1 - 75.7]	90	[87.7 - 91.9]	77.6	[74.2 - 80.7]	0.06
'INF98'	'INF38'	71.2	[67.2 - 74.8]	87.4	[84.8 - 89.6]	76.4	[73.0 - 79.6]	0.33
'INF157'	'INF3b'	81.8	[77.9 - 85.1]	97.5	[96.5 - 98.3]	87.3	[84.3 - 89.8]	0.2
'INF46'	'INF3b'	80.4	[76.5 - 83.9]	96.1	[94.7 - 97.1]	85.9	[82.8 - 88.6]	0.24
'INF82a'	'INF3b'	74.6	[70.6 - 78.2]	91.8	[89.7 - 93.5]	80.2	[76.8 - 83.2]	0.45
'INF82b'	'INF3b'	71.7	[67.7 - 75.3]	89.6	[87.3 - 91.6]	77.3	[73.8 - 80.4]	0.24
'INF90'	'INF3b'	71	[67.0 - 74.6]	89.4	[87.0 - 91.4]	76.6	[73.1 - 79.7]	0.37
'INF92'	'INF3b'	87.8	[84.3 - 90.6]	97	[95.8 - 97.8]	91.9	[89.4 - 93.9]	0.31
'INF94'	'INF3b'	71.1	[67.2 - 74.8]	90.5	[88.3 - 92.4]	76.9	[73.4 - 80.0]	0.28
'INF98'	'INF3b'	69	[65.1 - 72.6]	87.8	[85.3 - 90.0]	74.5	[71.0 - 77.7]	0
'INF157'	'INF46'	88.9	[85.6 - 91.6]	99.3	[98.9 - 99.6]	93.1	[90.8 - 94.9]	0.04
'INF82a'	'INF46'	72.3	[68.3 - 75.9]	91.1	[88.9 - 92.9]	78	[74.6 - 81.1]	0.68
'INF82b'	'INF46'	71	[67.1 - 74.7]	90.7	[88.5 - 92.5]	76.8	[73.3 - 79.9]	0
'INF90'	'INF46'	70.3	[66.3 - 73.9]	90.9	[88.7 - 92.7]	76.2	[72.7 - 79.3]	0.13
'INF92'	'INF46'	85.6	[81.9 - 88.6]	95.4	[93.9 - 96.6]	90	[87.2 - 92.2]	0.07
'INF94'	'INF46'	71.6	[67.6 - 75.2]	91.3	[89.1 - 93.1]	77.4	[73.9 - 80.5]	0.04
'INF98'	'INF46'	70.5	[66.6 - 74.2]	88.4	[86.0 - 90.5]	76	[72.5 - 79.2]	0.23
'INF157'	'INF82a'	73.1	[69.1 - 76.7]	92.8	[90.8 - 94.4]	79	[75.6 - 82.1]	0.65
'INF82b'	'INF82a'	69.3	[65.4 - 72.9]	88.4	[85.9 - 90.5]	74.9	[71.4 - 78.0]	0.69
'INF90'	'INF82a'	69.1	[65.2 - 72.7]	88.1	[85.6 - 90.2]	74.6	[71.1 - 77.8]	0.82
'INF92'	'INF82a'	75	[71.0 - 78.6]	91.7	[89.6 - 93.4]	80.5	[77.2 - 83.5]	0.76
'INF94'	'INF82a'	68.7	[64.8 - 72.4]	88.9	[86.5 - 90.9]	74.4	[70.9 - 77.6]	0.72
'INF98'	'INF82a'	73	[69.0 - 76.6]	91	[88.8 - 92.8]	78.6	[75.2 - 81.7]	0.45
'INF157'	'INF82b'	74.6	[70.6 - 78.2]	92.5	[90.5 - 94.1]	80.3	[76.9 - 83.3]	0.04
'INF90'	'INF82b'	92.7	[89.9 - 94.8]	97.6	[96.6 - 98.3]	95.5	[93.7 - 96.8]	0.13
'INF92'	'INF82b'	74.4	[70.4 - 78.0]	90.9	[88.7 - 92.7]	79.9	[76.5 - 82.9]	0.07
'INF94'	'INF82b'	98.6	[97.6 - 99.2]	99.6	[99.4 - 99.8]	99.4	[98.9 - 99.6]	0.03
'INF98'	'INF82b'	73.8	[69.9 - 77.5]	87.2	[84.6 - 89.4]	78.8	[75.4 - 81.9]	0.24
'INF157'	'INF90'	73.7	[69.7 - 77.3]	93.1	[91.1 - 94.6]	79.6	[76.2 - 82.7]	0.17
'INF92'	'INF90'	74.3	[70.3 - 77.9]	90.1	[87.8 - 92.0]	79.7	[76.3 - 82.7]	0.06
'INF94'	'INF90'	92.5	[89.7 - 94.6]	97.5	[96.5 - 98.2]	95.4	[93.5 - 96.7]	0.1
'INF98'	'INF90'	73.9	[69.9 - 77.5]	86.9	[84.3 - 89.1]	78.8	[75.3 - 81.8]	0.37
'INF157'	'INF92'	89.1	[85.7 - 91.7]	97.5	[96.4 - 98.2]	92.9	[90.6 - 94.7]	0.11
'INF94'	'INF92'	74.8	[70.8 - 78.4]	91.5	[89.4 - 93.2]	80.4	[77.0 - 83.4]	0.04
'INF98'	'INF92'	70.8	[66.9 - 74.5]	89.3	[87.0 - 91.3]	76.4	[72.9 - 79.6]	0.31
'INF157'	'INF94'	76.1	[72.1 - 79.6]	93.2	[91.3 - 94.7]	81.7	[78.4 - 84.7]	0.07
'INF98'	'INF94'	74.4	[70.5 - 78.1]	87.7	[85.1 - 89.8]	79.4	[76.0 - 82.5]	0.27
'INF157'	'INF98'	72.2	[68.2 - 75.8]	90.8	[88.6 - 92.7]	77.9	[74.4 - 81.0]	0.2
'INF103'	Leuconostoc argentinum KCTC 3773	16.1	[13.1 - 19.6]	25.8	[23.4 - 28.2]	16.3	[13.7 - 19.2]	5.09
'INF117'	Leuconostoc argentinum KCTC 3773	16.3	[13.3 - 19.8]	25.2	[22.9 - 27.7]	16.5	[13.9 - 19.4]	4.52
'INF131'	Leuconostoc argentinum KCTC 3773	16.8	[13.8 - 20.3]	24.8	[22.4 - 27.2]	16.9	[14.3 - 19.8]	5
'INF157'	Leuconostoc argentinum KCTC 3773	15.8	[12.9 - 19.3]	20	[17.8 - 22.4]	15.8	[13.3 - 18.7]	5.01
'INF166'	Leuconostoc argentinum KCTC 3773	16.5	[13.5 - 20.0]	24	[21.7 - 26.4]	16.6	[14.0 - 19.5]	5.04
'INF2'	Leuconostoc argentinum KCTC 3773	17	[14.0 - 20.5]	25.7	[23.3 - 28.2]	17.1	[14.5 - 20.1]	5.08
'INF36'	Leuconostoc argentinum KCTC 3773	16.3	[13.3 - 19.8]	24.6	[22.3 - 27.1]	16.4	[13.9 - 19.4]	4.6
'INF38'	Leuconostoc argentinum KCTC 3773	16.9	[13.9 - 20.4]	25.5	[23.2 - 28.0]	17	[14.4 - 19.9]	5.14
'INF3b'	Leuconostoc argentinum KCTC 3773	17	[13.9 - 20.5]	25.6	[23.2 - 28.0]	17.1	[14.5 - 20.0]	4.81
'INF46'	Leuconostoc argentinum KCTC 3773	16.2	[13.3 - 19.7]	23	[20.7 - 25.4]	16.3	[13.7 - 19.2]	5.05
'INF82a'	Leuconostoc argentinum KCTC 3773	16.7	[13.7 - 20.2]	25.9	[23.6 - 28.4]	16.8	[14.2 - 19.8]	4.36
'INF82b'	Leuconostoc argentinum KCTC 3773	16.7	[13.7 - 20.2]	25.6	[23.3 - 28.1]	16.8	[14.2 - 19.7]	5.05
'INF90'	Leuconostoc argentinum KCTC 3773	16.6	[13.6 - 20.1]	26.1	[23.7 - 28.5]	16.8	[14.2 - 19.7]	5.18
'INF92'	Leuconostoc argentinum KCTC 3773	16.4	[13.4 - 19.9]	24.1	[21.7 - 26.5]	16.5	[13.9 - 19.4]	5.12
'INF94'	Leuconostoc argentinum KCTC 3773	16.4	[13.4 - 19.9]	25.6	[23.3 - 28.1]	16.6	[14.0 - 19.5]	5.08
'INF98'	Leuconostoc argentinum KCTC 3773	16.9	[13.9 - 20.4]	25.8	[23.5 - 28.3]	17	[14.4 - 20.0]	4.81
'INF103'	Leuconostoc carnosum DSM 5576	16.2	[13.2 - 19.7]	21.9	[19.6 - 24.3]	16.2	[13.7 - 19.2]	0.88
'INF117'	Leuconostoc carnosum DSM 5576	15.9	[13.0 - 19.4]	21	[18.8 - 23.4]	15.9	[13.4 - 18.9]	1.45
'INF131'	Leuconostoc carnosum DSM 5576	16.6	[13.6 - 20.1]	22.3	[20.1 - 24.8]	16.6	[14.0 - 19.5]	0.97
'INF157'	Leuconostoc carnosum DSM 5576	16.2	[13.2 - 19.7]	19.4	[17.2 - 21.8]	16.1	[13.6 - 19.0]	0.96
'INF166'	Leuconostoc carnosum DSM 5576	16.3	[13.3 - 19.8]	21.2	[18.9 - 23.6]	16.3	[13.7 - 19.2]	0.93
'INF2'	Leuconostoc carnosum DSM 5576	17	[14.0 - 20.5]	22.4	[20.1 - 24.8]	17	[14.4 - 19.9]	0.89
'INF36'	Leuconostoc carnosum DSM 5576	16.6	[13.6 - 20.1]	22.5	[20.2 - 24.9]	16.6	[14.0 - 19.5]	1.37
'INF38'	Leuconostoc carnosum DSM 5576	16.7	[13.7 - 20.2]	21.6	[19.3 - 24.0]	16.6	[14.0 - 19.5]	0.83
'INF3b'	Leuconostoc carnosum DSM 5576	16.2	[13.2 - 19.7]	20.9	[18.7 - 23.4]	16.2	[13.6 - 19.1]	1.16
'INF46'	Leuconostoc carnosum DSM 5576	16.6	[13.6 - 20.1]	22.2	[19.9 - 24.6]	16.6	[14.0 - 19.5]	0.92
'INF82a'	Leuconostoc carnosum DSM 5576	16.7	[13.7 - 20.2]	22.5	[20.3 - 25.0]	16.7	[14.1 - 19.6]	1.61
'INF82b'	Leuconostoc carnosum DSM 5576	16.3	[13.3 - 19.7]	21.5	[19.3 - 23.9]	16.2	[13.7 - 19.2]	0.92
'INF90'	Leuconostoc carnosum DSM 5576	16.4	[13.4 - 19.9]	22.3	[20.1 - 24.8]	16.4	[13.9 - 19.4]	0.79
'INF92'	Leuconostoc carnosum DSM 5576	16.5	[13.5 - 20.0]	21.2	[18.9 - 23.6]	16.4	[13.9 - 19.4]	0.85
'INF94'	Leuconostoc carnosum DSM 5576	16.1	[13.1 - 19.6]	21.6	[19.4 - 24.0]	16.1	[13.6 - 19.0]	0.89
'INF98'	Leuconostoc carnosum DSM 5576	16.6	[13.6 - 20.1]	21.8	[19.6 - 24.3]	16.6	[14.0 - 19.5]	1.16
'INF103'	Leuconostoc gelidum KCTC 3527	15	[12.1 - 18.5]	22.7	[20.4 - 25.2]	15.2	[12.7 - 18.1]	1.21
'INF117'	Leuconostoc gelidum KCTC 3527	15.6	[12.7 - 19.1]	22.1	[19.9 - 24.6]	15.7	[13.2 - 18.6]	1.78
'INF131'	Leuconostoc gelidum KCTC 3527	15.7	[12.7 - 19.1]	21.3	[19.1 - 23.7]	15.7	[13.2 - 18.6]	1.29
'INF157'	Leuconostoc gelidum KCTC 3527	15.4	[12.5 - 18.9]	19.2	[17.0 - 21.6]	15.4	[12.9 - 18.3]	1.28
'INF166'	Leuconostoc gelidum KCTC 3527	15.7	[12.8 - 19.2]	21.6	[19.3 - 24.0]	15.8	[13.2 - 18.7]	1.25
'INF2'	Leuconostoc gelidum KCTC 3527	15.8	[12.9 - 19.3]	21.4	[19.1 - 23.8]	15.9	[13.3 - 18.8]	1.22
'INF36'	Leuconostoc gelidum KCTC 3527	15.4	[12.4 - 18.8]	21.1	[18.9 - 23.6]	15.5	[12.9 - 18.3]	1.69
'INF38'	Leuconostoc gelidum KCTC 3527	15.8	[12.9 - 19.3]	20.8	[18.6 - 23.2]	15.8	[13.3 - 18.7]	1.15
'INF3b'	Leuconostoc gelidum KCTC 3527	15.9	[12.9 - 19.4]	21.7	[19.4 - 24.1]	15.9	[13.4 - 18.8]	1.48
'INF46'	Leuconostoc gelidum KCTC 3527	15.3	[12.4 - 18.8]	20.7	[18.5 - 23.1]	15.4	[12.9 - 18.3]	1.25
'INF82a'	Leuconostoc gelidum KCTC 3527	15.6	[12.7 - 19.1]	22.1	[19.8 - 24.5]	15.7	[13.2 - 18.6]	1.93
'INF82b'	Leuconostoc gelidum KCTC 3527	15.4	[12.5 - 18.9]	21.4	[19.2 - 23.9]	15.5	[13.0 - 18.4]	1.24
'INF90'	Leuconostoc gelidum KCTC 3527	15.5	[12.6 - 19.0]	21.8	[19.5 - 24.2]	15.6	[13.1 - 18.5]	1.11
'INF92'	Leuconostoc gelidum KCTC 3527	15.4	[12.5 - 18.8]	20.5	[18.3 - 22.9]	15.5	[13.0 - 18.4]	1.17
'INF94'	Leuconostoc gelidum KCTC 3527	15.3	[12.4 - 18.8]	21.7	[19.4 - 24.1]	15.5	[13.0 - 18.4]	1.21
'INF98'	Leuconostoc gelidum KCTC 3527	15.7	[12.7 - 19.1]	21.6	[19.3 - 24.0]	15.8	[13.2 - 18.7]	1.48
'INF103'	Leuconostoc gelidum subsp. gasicomitatum LMG 18811	15.1	[12.2 - 18.5]	22.6	[20.3 - 25.0]	15.3	[12.8 - 18.2]	1.14
'INF117'	Leuconostoc gelidum subsp. gasicomitatum LMG 18811	15.4	[12.5 - 18.8]	20.6	[18.4 - 23.0]	15.5	[13.0 - 18.4]	1.71
'INF131'	Leuconostoc gelidum subsp. gasicomitatum LMG 18811	15.8	[12.8 - 19.2]	21.2	[18.9 - 23.6]	15.8	[13.3 - 18.7]	1.22
'INF157'	Leuconostoc gelidum subsp. gasicomitatum LMG 18811	15.6	[12.7 - 19.1]	19.3	[17.1 - 21.7]	15.6	[13.1 - 18.5]	1.22
'INF166'	Leuconostoc gelidum subsp. gasicomitatum LMG 18811	15.6	[12.7 - 19.1]	20.4	[18.1 - 22.8]	15.7	[13.2 - 18.6]	1.18
'INF2'	Leuconostoc gelidum subsp. gasicomitatum LMG 18811	16	[13.1 - 19.5]	21.7	[19.4 - 24.1]	16.1	[13.5 - 19.0]	1.15
'INF36'	Leuconostoc gelidum subsp. gasicomitatum LMG 18811	15.4	[12.4 - 18.8]	21	[18.8 - 23.5]	15.4	[12.9 - 18.3]	1.63
'INF38'	Leuconostoc gelidum subsp. gasicomitatum LMG 18811	15.9	[12.9 - 19.3]	21	[18.8 - 23.5]	15.9	[13.4 - 18.8]	1.09
'INF3b'	Leuconostoc gelidum subsp. gasicomitatum LMG 18811	15.6	[12.7 - 19.0]	20.4	[18.2 - 22.8]	15.6	[13.1 - 18.5]	1.42
'INF46'	Leuconostoc gelidum subsp. gasicomitatum LMG 18811	15.7	[12.7 - 19.1]	21	[18.7 - 23.4]	15.7	[13.2 - 18.6]	1.18
'INF82a'	Leuconostoc gelidum subsp. gasicomitatum LMG 18811	15.6	[12.7 - 19.1]	21.4	[19.2 - 23.9]	15.7	[13.2 - 18.6]	1.87
'INF82b'	Leuconostoc gelidum subsp. gasicomitatum LMG 18811	15.4	[12.5 - 18.8]	20.9	[18.6 - 23.3]	15.5	[13.0 - 18.4]	1.18
'INF90'	Leuconostoc gelidum subsp. gasicomitatum LMG 18811	15.6	[12.7 - 19.1]	21.5	[19.3 - 24.0]	15.7	[13.2 - 18.6]	1.05
'INF92'	Leuconostoc gelidum subsp. gasicomitatum LMG 18811	15.8	[12.9 - 19.3]	21.2	[19.0 - 23.7]	15.9	[13.3 - 18.8]	1.11
'INF94'	Leuconostoc gelidum subsp. gasicomitatum LMG 18811	15.3	[12.4 - 18.7]	21.1	[18.9 - 23.6]	15.4	[12.9 - 18.3]	1.14
'INF98'	Leuconostoc gelidum subsp. gasicomitatum LMG 18811	15.8	[12.9 - 19.3]	21.8	[19.5 - 24.2]	15.9	[13.4 - 18.8]	1.41
'INF103'	Leuconostoc kimchii IMSNU 11154	15.5	[12.6 - 19.0]	23.3	[21.0 - 25.8]	15.7	[13.2 - 18.6]	0.11
'INF117'	Leuconostoc kimchii IMSNU 11154	15.8	[12.9 - 19.3]	23.4	[21.1 - 25.9]	15.9	[13.4 - 18.8]	0.46
'INF131'	Leuconostoc kimchii IMSNU 11154	16.1	[13.1 - 19.6]	22.5	[20.2 - 24.9]	16.1	[13.6 - 19.1]	0.02
'INF157'	Leuconostoc kimchii IMSNU 11154	15.6	[12.7 - 19.1]	20.2	[18.0 - 22.7]	15.7	[13.1 - 18.6]	0.03
'INF166'	Leuconostoc kimchii IMSNU 11154	16.1	[13.1 - 19.6]	23.6	[21.3 - 26.1]	16.2	[13.6 - 19.1]	0.06
'INF2'	Leuconostoc kimchii IMSNU 11154	16.4	[13.4 - 19.9]	23.5	[21.2 - 25.9]	16.4	[13.9 - 19.4]	0.1
'INF36'	Leuconostoc kimchii IMSNU 11154	16.2	[13.3 - 19.7]	24.2	[21.9 - 26.7]	16.4	[13.8 - 19.3]	0.38
'INF38'	Leuconostoc kimchii IMSNU 11154	16.1	[13.2 - 19.6]	23.2	[20.9 - 25.6]	16.2	[13.7 - 19.1]	0.16
'INF3b'	Leuconostoc kimchii IMSNU 11154	16.1	[13.1 - 19.6]	23.5	[21.2 - 25.9]	16.2	[13.6 - 19.1]	0.17
'INF46'	Leuconostoc kimchii IMSNU 11154	16	[13.0 - 19.4]	24.1	[21.8 - 26.6]	16.1	[13.6 - 19.0]	0.07
'INF82a'	Leuconostoc kimchii IMSNU 11154	16.8	[13.8 - 20.3]	25.5	[23.2 - 28.0]	16.9	[14.3 - 19.9]	0.62
'INF82b'	Leuconostoc kimchii IMSNU 11154	16.2	[13.2 - 19.6]	24	[21.7 - 26.5]	16.3	[13.7 - 19.2]	0.07
'INF90'	Leuconostoc kimchii IMSNU 11154	16.2	[13.2 - 19.7]	24	[21.7 - 26.5]	16.3	[13.7 - 19.2]	0.2
'INF92'	Leuconostoc kimchii IMSNU 11154	15.7	[12.7 - 19.1]	22.9	[20.6 - 25.4]	15.8	[13.3 - 18.7]	0.14
'INF94'	Leuconostoc kimchii IMSNU 11154	16	[13.1 - 19.5]	24.2	[21.9 - 26.7]	16.2	[13.6 - 19.1]	0.1
'INF98'	Leuconostoc kimchii IMSNU 11154	16.4	[13.4 - 19.9]	25.4	[23.1 - 27.9]	16.6	[14.0 - 19.5]	0.17
'INF103'	Leuconostoc lactis JCM 6123	15.2	[12.3 - 18.6]	23.1	[20.8 - 25.6]	15.4	[12.9 - 18.3]	5.53
'INF117'	Leuconostoc lactis JCM 6123	15.5	[12.6 - 19.0]	22.4	[20.1 - 24.8]	15.6	[13.1 - 18.5]	4.96
'INF131'	Leuconostoc lactis JCM 6123	15.7	[12.7 - 19.1]	22.3	[20.0 - 24.7]	15.8	[13.2 - 18.7]	5.45
'INF157'	Leuconostoc lactis JCM 6123	15.6	[12.7 - 19.1]	20.7	[18.4 - 23.1]	15.7	[13.2 - 18.6]	5.45
'INF166'	Leuconostoc lactis JCM 6123	15.8	[12.9 - 19.3]	22.2	[19.9 - 24.7]	15.9	[13.3 - 18.8]	5.49
'INF2'	Leuconostoc lactis JCM 6123	16.1	[13.1 - 19.6]	23.9	[21.6 - 26.3]	16.2	[13.7 - 19.1]	5.52
'INF36'	Leuconostoc lactis JCM 6123	15.7	[12.8 - 19.2]	23.7	[21.4 - 26.1]	15.9	[13.3 - 18.8]	5.04
'INF38'	Leuconostoc lactis JCM 6123	15.7	[12.8 - 19.2]	22.5	[20.2 - 24.9]	15.8	[13.3 - 18.8]	5.58
'INF3b'	Leuconostoc lactis JCM 6123	15.7	[12.8 - 19.2]	22.9	[20.6 - 25.4]	15.8	[13.3 - 18.7]	5.25
'INF46'	Leuconostoc lactis JCM 6123	15.8	[12.8 - 19.3]	22.7	[20.4 - 25.2]	15.9	[13.4 - 18.8]	5.49
'INF82a'	Leuconostoc lactis JCM 6123	15.9	[12.9 - 19.3]	24	[21.6 - 26.4]	16	[13.5 - 18.9]	4.8
'INF82b'	Leuconostoc lactis JCM 6123	16	[13.0 - 19.4]	24.4	[22.0 - 26.8]	16.1	[13.6 - 19.0]	5.49
'INF90'	Leuconostoc lactis JCM 6123	15.8	[12.8 - 19.2]	23.9	[21.6 - 26.4]	15.9	[13.4 - 18.8]	5.62
'INF92'	Leuconostoc lactis JCM 6123	15.5	[12.6 - 18.9]	22.3	[20.1 - 24.8]	15.6	[13.1 - 18.5]	5.56
'INF94'	Leuconostoc lactis JCM 6123	15.7	[12.8 - 19.2]	24.7	[22.4 - 27.2]	15.9	[13.4 - 18.8]	5.53
'INF98'	Leuconostoc lactis JCM 6123	16.2	[13.3 - 19.7]	25.7	[23.4 - 28.2]	16.4	[13.9 - 19.4]	5.26
'INF103'	Leuconostoc litchii MB7	38	[34.6 - 41.5]	22.8	[20.5 - 25.2]	32.8	[29.9 - 35.9]	2.04
'INF117'	Leuconostoc litchii MB7	47.4	[44.0 - 50.8]	22.2	[20.0 - 24.7]	38.5	[35.6 - 41.6]	2.61
'INF131'	Leuconostoc litchii MB7	48.1	[44.7 - 51.5]	22.2	[20.0 - 24.7]	39	[36.0 - 42.0]	2.13
'INF157'	Leuconostoc litchii MB7	58.3	[54.7 - 61.8]	22	[19.7 - 24.4]	44.8	[41.8 - 47.8]	2.12
'INF166'	Leuconostoc litchii MB7	49.9	[46.5 - 53.4]	22.3	[20.0 - 24.7]	40.1	[37.1 - 43.1]	2.09
'INF2'	Leuconostoc litchii MB7	47.7	[44.3 - 51.1]	22.2	[19.9 - 24.6]	38.7	[35.7 - 41.7]	2.05
'INF36'	Leuconostoc litchii MB7	48.7	[45.3 - 52.1]	22.5	[20.3 - 25.0]	39.5	[36.5 - 42.6]	2.53
'INF38'	Leuconostoc litchii MB7	49.8	[46.3 - 53.2]	22.3	[20.0 - 24.7]	40	[37.0 - 43.0]	1.99
'INF3b'	Leuconostoc litchii MB7	47.2	[43.8 - 50.6]	22.2	[20.0 - 24.7]	38.4	[35.4 - 41.4]	2.32
'INF46'	Leuconostoc litchii MB7	49.4	[46.0 - 52.8]	22.1	[19.9 - 24.6]	39.7	[36.7 - 42.7]	2.08
'INF82a'	Leuconostoc litchii MB7	45.2	[41.8 - 48.6]	22.7	[20.4 - 25.1]	37.4	[34.5 - 40.5]	2.77
'INF82b'	Leuconostoc litchii MB7	47.2	[43.8 - 50.7]	22.4	[20.1 - 24.8]	38.5	[35.6 - 41.6]	2.08
'INF90'	Leuconostoc litchii MB7	46.8	[43.4 - 50.3]	22.5	[20.2 - 24.9]	38.3	[35.4 - 41.4]	1.95
'INF92'	Leuconostoc litchii MB7	48.4	[45.0 - 51.9]	22.2	[19.9 - 24.6]	39.1	[36.2 - 42.2]	2.01
'INF94'	Leuconostoc litchii MB7	42.2	[38.9 - 45.7]	22.8	[20.5 - 25.3]	35.6	[32.7 - 38.7]	2.04
'INF98'	Leuconostoc litchii MB7	45.8	[42.4 - 49.2]	22.6	[20.3 - 25.1]	37.8	[34.8 - 40.8]	2.32
'INF103'	Leuconostoc mesenteroides ATCC 8293	79.3	[75.3 - 82.8]	94.7	[93.0 - 96.0]	84.8	[81.5 - 87.5]	0.14
'INF117'	Leuconostoc mesenteroides ATCC 8293	73.7	[69.7 - 77.3]	92.6	[90.6 - 94.2]	79.5	[76.1 - 82.6]	0.7
'INF131'	Leuconostoc mesenteroides ATCC 8293	72.5	[68.5 - 76.2]	91.1	[88.9 - 92.9]	78.2	[74.8 - 81.3]	0.22
'INF157'	Leuconostoc mesenteroides ATCC 8293	86.7	[83.1 - 89.6]	94	[92.2 - 95.4]	90.6	[88.0 - 92.8]	0.21
'INF166'	Leuconostoc mesenteroides ATCC 8293	75.4	[71.4 - 79.0]	92.7	[90.8 - 94.3]	81.1	[77.7 - 84.1]	0.18
'INF2'	Leuconostoc mesenteroides ATCC 8293	67.5	[63.7 - 71.2]	89.4	[87.1 - 91.4]	73.4	[69.9 - 76.6]	0.15
'INF36'	Leuconostoc mesenteroides ATCC 8293	74.4	[70.4 - 78.0]	94	[92.2 - 95.4]	80.4	[77.0 - 83.4]	0.62
'INF38'	Leuconostoc mesenteroides ATCC 8293	76.3	[72.4 - 79.9]	92.5	[90.4 - 94.1]	81.9	[78.5 - 84.8]	0.08
'INF3b'	Leuconostoc mesenteroides ATCC 8293	75	[71.0 - 78.6]	92.6	[90.7 - 94.2]	80.7	[77.3 - 83.7]	0.41
'INF46'	Leuconostoc mesenteroides ATCC 8293	76.9	[72.9 - 80.5]	92.9	[90.9 - 94.4]	82.4	[79.1 - 85.3]	0.18
'INF82a'	Leuconostoc mesenteroides ATCC 8293	69.5	[65.6 - 73.2]	90.2	[87.9 - 92.1]	75.3	[71.9 - 78.5]	0.86
'INF82b'	Leuconostoc mesenteroides ATCC 8293	79.4	[75.5 - 82.9]	92.9	[91.0 - 94.5]	84.6	[81.3 - 87.3]	0.17
'INF90'	Leuconostoc mesenteroides ATCC 8293	78.4	[74.4 - 81.9]	92.8	[90.9 - 94.4]	83.7	[80.4 - 86.5]	0.04
'INF92'	Leuconostoc mesenteroides ATCC 8293	79.5	[75.6 - 83.0]	92.9	[90.9 - 94.4]	84.7	[81.4 - 87.4]	0.1
'INF94'	Leuconostoc mesenteroides ATCC 8293	80.1	[76.2 - 83.5]	93.5	[91.6 - 94.9]	85.2	[82.1 - 87.9]	0.14
'INF98'	Leuconostoc mesenteroides ATCC 8293	67.9	[64.1 - 71.6]	89	[86.6 - 91.1]	73.7	[70.2 - 76.9]	0.41
'INF103'	Leuconostoc mesenteroides subsp. cremoris ATCC 19254	59.5	[55.8 - 63.0]	88.9	[86.5 - 91.0]	65.5	[62.1 - 68.7]	0.05
'INF117'	Leuconostoc mesenteroides subsp. cremoris ATCC 19254	61.6	[57.9 - 65.2]	88	[85.4 - 90.1]	67.5	[64.1 - 70.7]	0.52
'INF131'	Leuconostoc mesenteroides subsp. cremoris ATCC 19254	62.3	[58.6 - 65.9]	90.8	[88.6 - 92.7]	68.5	[65.1 - 71.8]	0.03
'INF157'	Leuconostoc mesenteroides subsp. cremoris ATCC 19254	66.8	[63.0 - 70.5]	91.7	[89.6 - 93.4]	73.1	[69.6 - 76.3]	0.02
'INF166'	Leuconostoc mesenteroides subsp. cremoris ATCC 19254	62.8	[59.1 - 66.4]	88	[85.5 - 90.1]	68.6	[65.2 - 71.9]	0.01
'INF2'	Leuconostoc mesenteroides subsp. cremoris ATCC 19254	63.3	[59.5 - 66.9]	90.5	[88.2 - 92.4]	69.5	[66.0 - 72.7]	0.04
'INF36'	Leuconostoc mesenteroides subsp. cremoris ATCC 19254	59.1	[55.4 - 62.6]	88	[85.5 - 90.1]	64.9	[61.6 - 68.2]	0.44
'INF38'	Leuconostoc mesenteroides subsp. cremoris ATCC 19254	62.1	[58.4 - 65.7]	87.8	[85.3 - 90.0]	67.9	[64.5 - 71.2]	0.11
'INF3b'	Leuconostoc mesenteroides subsp. cremoris ATCC 19254	59.6	[56.0 - 63.2]	87.6	[85.1 - 89.8]	65.4	[62.1 - 68.7]	0.22
'INF46'	Leuconostoc mesenteroides subsp. cremoris ATCC 19254	61.9	[58.2 - 65.5]	88.5	[86.0 - 90.6]	67.9	[64.5 - 71.1]	0.01
'INF82a'	Leuconostoc mesenteroides subsp. cremoris ATCC 19254	59.9	[56.3 - 63.5]	88.8	[86.4 - 90.9]	65.9	[62.5 - 69.2]	0.67
'INF82b'	Leuconostoc mesenteroides subsp. cremoris ATCC 19254	56.2	[52.7 - 59.7]	89.4	[87.0 - 91.4]	62.3	[59.0 - 65.4]	0.02
'INF90'	Leuconostoc mesenteroides subsp. cremoris ATCC 19254	57.6	[54.0 - 61.1]	88.7	[86.2 - 90.7]	63.5	[60.2 - 66.7]	0.15
'INF92'	Leuconostoc mesenteroides subsp. cremoris ATCC 19254	61.6	[57.9 - 65.1]	88.5	[86.1 - 90.6]	67.5	[64.1 - 70.7]	0.09
'INF94'	Leuconostoc mesenteroides subsp. cremoris ATCC 19254	57.2	[53.6 - 60.7]	89.9	[87.6 - 91.8]	63.3	[60.0 - 66.5]	0.05
'INF98'	Leuconostoc mesenteroides subsp. cremoris ATCC 19254	63.7	[59.9 - 67.3]	90.5	[88.2 - 92.3]	69.8	[66.4 - 73.1]	0.22
'INF103'	Leuconostoc mesenteroides subsp. dextranicum DSM 20484	69	[65.1 - 72.6]	92.7	[90.8 - 94.3]	75.3	[71.8 - 78.4]	0.24
'INF117'	Leuconostoc mesenteroides subsp. dextranicum DSM 20484	71.6	[67.6 - 75.2]	92.4	[90.3 - 94.0]	77.6	[74.1 - 80.7]	0.33
'INF131'	Leuconostoc mesenteroides subsp. dextranicum DSM 20484	80.7	[76.7 - 84.1]	98	[97.1 - 98.6]	86.5	[83.4 - 89.0]	0.15
'INF157'	Leuconostoc mesenteroides subsp. dextranicum DSM 20484	85.9	[82.3 - 88.9]	93.7	[91.8 - 95.1]	90	[87.2 - 92.2]	0.16
'INF166'	Leuconostoc mesenteroides subsp. dextranicum DSM 20484	74.1	[70.1 - 77.7]	92.5	[90.5 - 94.1]	79.9	[76.5 - 82.9]	0.19
'INF2'	Leuconostoc mesenteroides subsp. dextranicum DSM 20484	69.9	[66.0 - 73.6]	93	[91.0 - 94.5]	76.2	[72.7 - 79.3]	0.23
'INF36'	Leuconostoc mesenteroides subsp. dextranicum DSM 20484	71.2	[67.3 - 74.9]	91.6	[89.4 - 93.3]	77.2	[73.7 - 80.3]	0.25
'INF38'	Leuconostoc mesenteroides subsp. dextranicum DSM 20484	72.3	[68.3 - 75.9]	93.3	[91.5 - 94.8]	78.4	[74.9 - 81.5]	0.29
'INF3b'	Leuconostoc mesenteroides subsp. dextranicum DSM 20484	72.2	[68.2 - 75.8]	94.4	[92.6 - 95.7]	78.5	[75.0 - 81.6]	0.04
'INF46'	Leuconostoc mesenteroides subsp. dextranicum DSM 20484	76.6	[72.6 - 80.1]	93.7	[91.9 - 95.1]	82.2	[78.9 - 85.2]	0.2
'INF82a'	Leuconostoc mesenteroides subsp. dextranicum DSM 20484	80.5	[76.5 - 83.9]	97.8	[96.9 - 98.5]	86.3	[83.2 - 88.9]	0.49
'INF82b'	Leuconostoc mesenteroides subsp. dextranicum DSM 20484	69.1	[65.1 - 72.7]	91.4	[89.3 - 93.2]	75.1	[71.6 - 78.3]	0.2
'INF90'	Leuconostoc mesenteroides subsp. dextranicum DSM 20484	68.7	[64.8 - 72.3]	91.1	[88.9 - 92.9]	74.7	[71.2 - 77.9]	0.33
'INF92'	Leuconostoc mesenteroides subsp. dextranicum DSM 20484	78.4	[74.4 - 81.9]	94.3	[92.5 - 95.6]	83.9	[80.6 - 86.7]	0.27
'INF94'	Leuconostoc mesenteroides subsp. dextranicum DSM 20484	70.4	[66.5 - 74.1]	91.7	[89.6 - 93.4]	76.4	[73.0 - 79.6]	0.24
'INF98'	Leuconostoc mesenteroides subsp. dextranicum DSM 20484	71.2	[67.3 - 74.9]	93.4	[91.5 - 94.8]	77.4	[74.0 - 80.5]	0.04
'INF103'	Leuconostoc mesenteroides subsp. jonggajibkimchii DRC1506	74.7	[70.7 - 78.3]	92.1	[90.0 - 93.8]	80.4	[77.0 - 83.4]	0.13
'INF117'	Leuconostoc mesenteroides subsp. jonggajibkimchii DRC1506	73.8	[69.8 - 77.4]	91.5	[89.4 - 93.3]	79.4	[76.0 - 82.5]	0.7
'INF131'	Leuconostoc mesenteroides subsp. jonggajibkimchii DRC1506	72.1	[68.1 - 75.7]	91.1	[88.9 - 92.9]	77.8	[74.4 - 81.0]	0.21
'INF157'	Leuconostoc mesenteroides subsp. jonggajibkimchii DRC1506	83.7	[79.9 - 86.9]	92.3	[90.3 - 94.0]	88	[85.1 - 90.5]	0.2
'INF166'	Leuconostoc mesenteroides subsp. jonggajibkimchii DRC1506	74.3	[70.3 - 77.9]	91.6	[89.4 - 93.3]	79.9	[76.5 - 82.9]	0.17
'INF2'	Leuconostoc mesenteroides subsp. jonggajibkimchii DRC1506	67.1	[63.3 - 70.8]	89.6	[87.2 - 91.5]	73	[69.5 - 76.2]	0.14
'INF36'	Leuconostoc mesenteroides subsp. jonggajibkimchii DRC1506	70.8	[66.9 - 74.5]	90.5	[88.3 - 92.4]	76.6	[73.1 - 79.8]	0.62
'INF38'	Leuconostoc mesenteroides subsp. jonggajibkimchii DRC1506	71.1	[67.2 - 74.8]	92.2	[90.2 - 93.9]	77.1	[73.7 - 80.3]	0.07
'INF3b'	Leuconostoc mesenteroides subsp. jonggajibkimchii DRC1506	71.2	[67.3 - 74.9]	92	[90.0 - 93.7]	77.2	[73.8 - 80.3]	0.4
'INF46'	Leuconostoc mesenteroides subsp. jonggajibkimchii DRC1506	75.5	[71.5 - 79.1]	91.7	[89.6 - 93.5]	81	[77.6 - 84.0]	0.17
'INF82a'	Leuconostoc mesenteroides subsp. jonggajibkimchii DRC1506	69.2	[65.3 - 72.9]	89.5	[87.1 - 91.5]	75	[71.5 - 78.1]	0.85
'INF82b'	Leuconostoc mesenteroides subsp. jonggajibkimchii DRC1506	73.1	[69.1 - 76.7]	90.5	[88.2 - 92.3]	78.6	[75.2 - 81.7]	0.16
'INF90'	Leuconostoc mesenteroides subsp. jonggajibkimchii DRC1506	72.4	[68.4 - 76.0]	90.4	[88.1 - 92.3]	78	[74.6 - 81.1]	0.03
'INF92'	Leuconostoc mesenteroides subsp. jonggajibkimchii DRC1506	77.9	[73.9 - 81.4]	92.2	[90.1 - 93.8]	83.1	[79.9 - 86.0]	0.09
'INF94'	Leuconostoc mesenteroides subsp. jonggajibkimchii DRC1506	74.7	[70.7 - 78.3]	90.7	[88.5 - 92.6]	80.1	[76.7 - 83.1]	0.13
'INF98'	Leuconostoc mesenteroides subsp. jonggajibkimchii DRC1506	68.6	[64.7 - 72.2]	88.9	[86.5 - 90.9]	74.3	[70.8 - 77.5]	0.4
'INF103'	Leuconostoc pseudomesenteroides NCDO 768	18	[14.9 - 21.6]	22	[19.7 - 24.5]	17.8	[15.2 - 20.8]	1.03
'INF117'	Leuconostoc pseudomesenteroides NCDO 768	19.6	[16.4 - 23.2]	20.6	[18.3 - 23.0]	18.9	[16.2 - 21.9]	0.46
'INF131'	Leuconostoc pseudomesenteroides NCDO 768	19.4	[16.2 - 23.0]	20.2	[18.0 - 22.6]	18.7	[16.1 - 21.8]	0.95
'INF157'	Leuconostoc pseudomesenteroides NCDO 768	20.1	[17.0 - 23.8]	19.3	[17.1 - 21.7]	19.2	[16.5 - 22.3]	0.96
'INF166'	Leuconostoc pseudomesenteroides NCDO 768	20	[16.8 - 23.6]	20.2	[18.0 - 22.6]	19.2	[16.5 - 22.2]	0.99
'INF2'	Leuconostoc pseudomesenteroides NCDO 768	19.9	[16.8 - 23.5]	21	[18.7 - 23.4]	19.3	[16.5 - 22.3]	1.02
'INF36'	Leuconostoc pseudomesenteroides NCDO 768	19.7	[16.5 - 23.3]	20.7	[18.5 - 23.1]	19	[16.3 - 22.1]	0.54
'INF38'	Leuconostoc pseudomesenteroides NCDO 768	19.9	[16.8 - 23.6]	20.1	[17.9 - 22.5]	19.2	[16.5 - 22.2]	1.09
'INF3b'	Leuconostoc pseudomesenteroides NCDO 768	20	[16.8 - 23.6]	20.4	[18.2 - 22.8]	19.3	[16.6 - 22.3]	0.76
'INF46'	Leuconostoc pseudomesenteroides NCDO 768	19.6	[16.4 - 23.2]	20.1	[17.9 - 22.5]	18.9	[16.2 - 21.9]	0.99
'INF82a'	Leuconostoc pseudomesenteroides NCDO 768	19.6	[16.4 - 23.2]	20.7	[18.5 - 23.2]	19	[16.3 - 22.0]	0.31
'INF82b'	Leuconostoc pseudomesenteroides NCDO 768	19.9	[16.7 - 23.5]	21	[18.8 - 23.5]	19.2	[16.5 - 22.2]	1
'INF90'	Leuconostoc pseudomesenteroides NCDO 768	19.7	[16.5 - 23.3]	21	[18.8 - 23.4]	19	[16.4 - 22.1]	1.13
'INF92'	Leuconostoc pseudomesenteroides NCDO 768	19.5	[16.3 - 23.1]	19.8	[17.6 - 22.2]	18.8	[16.1 - 21.8]	1.07
'INF94'	Leuconostoc pseudomesenteroides NCDO 768	19.2	[16.0 - 22.8]	21.3	[19.0 - 23.7]	18.7	[16.0 - 21.7]	1.03
'INF98'	Leuconostoc pseudomesenteroides NCDO 768	19.3	[16.2 - 22.9]	21.1	[18.8 - 23.5]	18.8	[16.1 - 21.8]	0.76
'INF103'	Leuconostoc rapi DSM 27776	15.4	[12.5 - 18.8]	21.7	[19.5 - 24.2]	15.5	[13.0 - 18.4]	0.15
'INF117'	Leuconostoc rapi DSM 27776	15.5	[12.6 - 19.0]	21.6	[19.4 - 24.1]	15.6	[13.1 - 18.5]	0.42
'INF131'	Leuconostoc rapi DSM 27776	16.1	[13.1 - 19.6]	21.7	[19.5 - 24.2]	16.1	[13.6 - 19.0]	0.07
'INF157'	Leuconostoc rapi DSM 27776	15.7	[12.8 - 19.2]	19.7	[17.5 - 22.1]	15.7	[13.2 - 18.6]	0.08
'INF166'	Leuconostoc rapi DSM 27776	15.9	[13.0 - 19.4]	21.8	[19.5 - 24.2]	16	[13.4 - 18.9]	0.11
'INF2'	Leuconostoc rapi DSM 27776	16	[13.1 - 19.5]	22.2	[20.0 - 24.7]	16.1	[13.5 - 19.0]	0.14
'INF36'	Leuconostoc rapi DSM 27776	16.3	[13.3 - 19.8]	22	[19.7 - 24.4]	16.3	[13.7 - 19.2]	0.34
'INF38'	Leuconostoc rapi DSM 27776	15.7	[12.7 - 19.1]	21.5	[19.3 - 24.0]	15.7	[13.2 - 18.6]	0.21
'INF3b'	Leuconostoc rapi DSM 27776	15.8	[12.9 - 19.3]	22	[19.8 - 24.5]	15.9	[13.4 - 18.8]	0.12
'INF46'	Leuconostoc rapi DSM 27776	15.8	[12.9 - 19.3]	22.3	[20.0 - 24.8]	15.9	[13.4 - 18.8]	0.11
'INF82a'	Leuconostoc rapi DSM 27776	16.3	[13.3 - 19.7]	22.6	[20.3 - 25.0]	16.3	[13.7 - 19.2]	0.57
'INF82b'	Leuconostoc rapi DSM 27776	16.1	[13.2 - 19.6]	21.2	[19.0 - 23.7]	16.1	[13.6 - 19.1]	0.12
'INF90'	Leuconostoc rapi DSM 27776	16	[13.1 - 19.5]	21.1	[18.9 - 23.5]	16	[13.5 - 19.0]	0.25
'INF92'	Leuconostoc rapi DSM 27776	15.7	[12.8 - 19.2]	21.7	[19.4 - 24.1]	15.8	[13.2 - 18.7]	0.19
'INF94'	Leuconostoc rapi DSM 27776	16	[13.1 - 19.5]	21.3	[19.1 - 23.8]	16	[13.5 - 19.0]	0.15
'INF98'	Leuconostoc rapi DSM 27776	15.9	[12.9 - 19.4]	21.9	[19.7 - 24.4]	16	[13.4 - 18.9]	0.12
'INF103'	Leuconostoc suionicum DSM 20241	69.3	[65.4 - 72.9]	56.4	[53.6 - 59.1]	68.6	[65.2 - 71.8]	0.22
'INF117'	Leuconostoc suionicum DSM 20241	68.8	[64.9 - 72.5]	56.3	[53.6 - 59.0]	68.2	[64.8 - 71.4]	0.79
'INF131'	Leuconostoc suionicum DSM 20241	66.8	[63.0 - 70.5]	55.9	[53.1 - 58.6]	66.4	[63.0 - 69.6]	0.31
'INF157'	Leuconostoc suionicum DSM 20241	79.6	[75.7 - 83.1]	56	[53.3 - 58.8]	77.2	[73.8 - 80.4]	0.3
'INF166'	Leuconostoc suionicum DSM 20241	70.3	[66.4 - 74.0]	56.5	[53.8 - 59.3]	69.5	[66.1 - 72.8]	0.27
'INF2'	Leuconostoc suionicum DSM 20241	64.4	[60.6 - 68.0]	55.7	[52.9 - 58.4]	64.2	[60.8 - 67.4]	0.23
'INF36'	Leuconostoc suionicum DSM 20241	69.3	[65.4 - 72.9]	56	[53.2 - 58.7]	68.5	[65.0 - 71.7]	0.71
'INF38'	Leuconostoc suionicum DSM 20241	69	[65.1 - 72.7]	55.6	[52.9 - 58.3]	68.2	[64.7 - 71.4]	0.17
'INF3b'	Leuconostoc suionicum DSM 20241	67.5	[63.7 - 71.2]	56.2	[53.5 - 58.9]	67	[63.6 - 70.3]	0.5
'INF46'	Leuconostoc suionicum DSM 20241	71.1	[67.2 - 74.8]	56	[53.3 - 58.8]	70.1	[66.6 - 73.3]	0.26
'INF82a'	Leuconostoc suionicum DSM 20241	62.6	[58.8 - 66.2]	56.1	[53.3 - 58.8]	62.7	[59.4 - 65.9]	0.95
'INF82b'	Leuconostoc suionicum DSM 20241	72.1	[68.1 - 75.7]	55.1	[52.4 - 57.8]	70.7	[67.2 - 73.9]	0.26
'INF90'	Leuconostoc suionicum DSM 20241	71.8	[67.9 - 75.5]	55.6	[52.9 - 58.3]	70.6	[67.1 - 73.8]	0.13
'INF92'	Leuconostoc suionicum DSM 20241	73.3	[69.3 - 76.9]	56	[53.2 - 58.7]	71.9	[68.4 - 75.1]	0.19
'INF94'	Leuconostoc suionicum DSM 20241	71.8	[67.8 - 75.4]	56.1	[53.4 - 58.8]	70.7	[67.2 - 73.9]	0.22
'INF98'	Leuconostoc suionicum DSM 20241	64.7	[60.9 - 68.3]	56.3	[53.5 - 59.0]	64.6	[61.2 - 67.8]	0.5
