# Supplementary figures and images for: Genetic Diversity of Leuconostoc mesenteroides Isolates from Traditional Montenegrin Brine Cheese
Source: MDPI journal article supplement (doi:10.3390/microorganisms9081612), 2021-07-28

Figure S3. ANI heatmap.

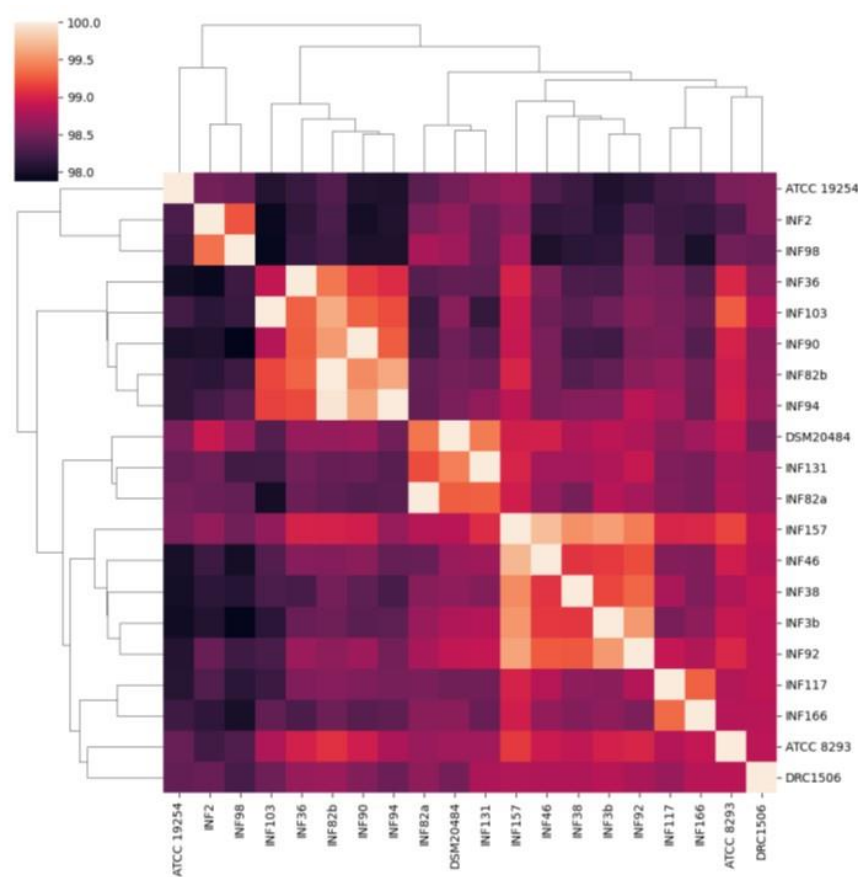

Supplement: s1 [file s1]
